# Supplementary material for: The practice of evaluating epidemic response in humanitarian and low-income settings: a systematic review
Source: BMC Med. 2020 Nov 3;18:315. doi: 10.1186/s12916-020-01767-8 (PMC7606030; doi:10.1186/s12916-020-01767-8)
Supplement: Supplementary file 1 — Additional file 1. List of Epidemics. [file 12916_2020_1767_MOESM1_ESM.xlsx]

## Sheet: Sheet1
year	month	Disease	Humanitarian	Category	Location	Source
2011	11	Brucelosis	Y	Low income	Afghanistan	GIM
2017	12	Cholera	Y	Low income	Afghanistan	GIM
2018	6	Cholera	Y	Low income	Afghanistan	GIM
2019	4	Cholera	Y	Low income	Afghanistan	GIM
2019	10	Dengue	Y	Low income	Afghanistan	GIM
2012	2	Measles	Y	Low income	Afghanistan	RW
2014	10	Polio	Y	Low income	Afghanistan	GIM
2012	10	Cholera	N	Low income	Benin	RW
2013	8	Cholera	N	Low income	Benin	RW
2016	1	Cholera	N	Low income	Benin	DONS
2018	12	Cholera	N	Low income	Benin	GIM
2010	9	Cholera	N	Low income	Benin	PROMED
2016	n.a	Cholera	N	Low income	Benin	UNICEF cholera platform
2014	11	Lassa Fever	N	Low income	Benin	GIM
2017	2	Lassa Fever	N	Low income	Benin	DONS
2012	3	Meningococcal disease	N	Low income	Benin	DONS
2013	6	Meningococcal disease	N	Low income	Benin	DONS
2012	8	Cholera	Y	Low income	Burkina Faso	RW
2016	8	Cholera	Y	Low income	Burkina Faso	DONS
2016	11	Cholera	Y	Low income	Burkina Faso	GIM
2017	9	Cholera	Y	Low income	Burkina Faso	DONS
2017	2	Lassa Fever	Y	Low income	Burkina Faso	DONS
2012	3	Meningococcal disease	Y	Low income	Burkina Faso	DONS
2013	6	Meningococcal disease	Y	Low income	Burkina Faso	DONS
2011	8	Cholera	Y	Low income	Burundi	RW
2012	10	Cholera	Y	Low income	Burundi	RW
2015	5	Cholera	Y	Low income	Burundi	GIM
2016	7	Cholera	Y	Low income	Burundi	RW
2017	1	Cholera	Y	Low income	Burundi	GIM
2017	8	Cholera	Y	Low income	Burundi	GIM
2018	12	Cholera	Y	Low income	Burundi	GIM
2019	5	Cholera	Y	Low income	Burundi	RW
2011	8	Cholera	Y	Low income	Burundi	PROMED
2018	n.a	Cholera	Y	Low income	Burundi	UNICEF cholera platform
2015	2	Malaria	Y	Low income	Burundi	GIM
2017	3	malaria	Y	Low income	Burundi	RW
2019	8	Malaria	Y	Low income	Burundi	GIM
2011	10	Cholera	Y	Low income	Central African Republic	RW
2015	12	Cholera	Y	Low income	Central African Republic	RW
2016	9	Cholera	Y	Low income	Central African Republic	DONS
2019	5	Cholera	Y	Low income	Central African Republic	GIM
2016	n.a	Cholera	Y	Low income	Central African Republic	UNICEF cholera platform
2013	7	Malaria	Y	Low income	Central African Republic	GIM
2013	1	Measles	Y	Low income	Central African Republic	RW
2010	7	Cholera	Y	Low income	Chad	DONS
2011	3	Cholera	Y	Low income	Chad	RW
2016	9	Cholera	Y	Low income	Chad	DONS
2017	9	Cholera	Y	Low income	chad	GIM
2018	9	Cholera	Y	Low income	chad	GIM
2011	9	Cholera	Y	Low income	Chad	PROMED
2017	n.a	Cholera	Y	Low income	Chad	UNICEF cholera platform
2018	1	Measles	Y	Low income	Chad	RW
2011	3	Measles	Y	Low income	Chad	RW
2011	3	Meningitis	Y	Low income	Chad	RW
2012	5	Meningitis	Y	Low income	Chad	RW
2010	4	Meningococcal disease	Y	Low income	Chad	DONS
2011	3	Meningococcal disease	Y	Low income	Chad	DONS
2012	3	Meningococcal disease	Y	Low income	Chad	DONS
2011	6	Polio	Y	Low income	Chad	DONS
2013	2	Yellow fever	Y	Low income	Chad	DONS
2011	3	Cholera	Y	Low income	DRC	PROMED
2011	4	Cholera	Y	Low income	DRC	PROMED
2011	6	Cholera	Y	Low income	DRC	PROMED
2011	7	Cholera	Y	Low income	DRC	DONS
2012	7	Cholera	Y	Low income	DRC	DONS
2013	1	Cholera	Y	Low income	DRC	RW
2015	9	Cholera	Y	Low income	DRC	GIM
2015	12	Cholera	Y	Low income	DRC	DONS
2016	9	Cholera	Y	Low income	DRC	GIM
2017	5	Cholera	Y	Low income	DRC	DONS
2017	6	Cholera	Y	Low income	DRC	GIM
2018	4	Cholera	Y	Low income	DRC	DONS
2018	5	Cholera	Y	Low income	DRC	GIM
2016	n.a	Cholera	Y	Low income	DRC	UNICEF cholera platform
2018	n.a	Cholera	Y	Low income	DRC	UNICEF cholera platform
2019	n.a	Cholera	Y	Low income	DRC	UNICEF cholera platform
2012	8	Dengue	Y	Low income	DRC	GIM
2012	8	Ebola	Y	Low income	DRC	GIM
2013	5	Ebola	Y	Low income	DRC	GIM
2014	7	Ebola	Y	Low income	DRC	GIM
2018	8	Ebola	Y	Low income	DRC	PROMED
2019	7	Ebola	Y	Low income	DRC	GIM
2012	5	Malaria	Y	Low income	DRC	GIM
2013	2	Malaria	Y	Low income	DRC	PROMED
2011	7	Measles	Y	Low income	DRC	DONS
2013	1	Measles	Y	Low income	DRC	RW
2011	3	Measles	Y	Low income	DRC	PROMED
2012	3	Measles	Y	Low income	DRC	PROMED
2013	7	Measles	Y	Low income	DRC	PROMED
2015	7	Measles	Y	Low income	DRC	PROMED
2010	6	Polio	Y	Low income	DRC	DONS
2010	6	Yellow fever	Y	Low income	DRC	DONS
2012	12	Yellow fever	Y	Low income	DRC	DONS
2013	6	Yellow fever	Y	Low income	DRC	DONS
2014	4	Yellow fever	Y	Low income	DRC	DONS
2016	4	Yellow Fever	Y	Low income	DRC	PROMED
2016	9	Cholera	N	Low income	Eritrea	GIM
2011	7	Measles	Y	Low income	Ethiopia	PROMED
2013	5	Yellow fever	Y	Low income	Ethiopia	DONS
2013	10	Polio	Y	Low income	Ethiopia	DONS
2013	11	Cholera	Y	Low income	Ethiopia	GIM
2015	7	Cholera	Y	Low income	Ethiopia	DONS
2016	5	Cholera	Y	Low income	Ethiopia	RW
2017	3	Cholera	Y	Low income	Ethiopia	GIM
2019	6	Cholera	Y	Low income	Ethiopia	GIM
2019	8	Chikungunya	Y	Low income	Ethiopia	GIM
2018	1	Rift Valley Fever	N	Low income	Gambia	DONS
2010	1	Yellow fever	N	Low income	Guinea	DONS
2012	3	Cholera	N	Low income	Guinea	PROMED
2013	3	Meningitis	N	Low income	Guinea	PROMED
2013	5	Cholera	N	Low income	Guinea	PROMED
2013	6	Meningococcal disease	N	Low income	Guinea	DONS
2014	1	Polio	N	Low income	Guinea	DONS
2014	2	Measles	N	Low income	Guinea	RW
2014	3	Ebola	N	Low income	Guinea	DONS
2014	5	Anthrax	N	Low income	Guinea	GIM
2014	9	Malaria	N	Low income	Guinea	GIM
2015	5	Cholera	N	Low income	Guinea	GIM
2017	2	Measles	N	Low income	Guinea	RW
2018	2	Cholera	N	Low income	Guinea	GIM
2019	2	Cholera	N	Low income	Guinea	GIM
2011	6	Anthrax	N	Low income	Guinea-Bissau	GIM
2018	1	Cholera	Y	Low income	Haiti	RW
2010	10	Cholera	Y	Low income	Haiti	DONS
2012	5	Cholera	Y	Low income	Haiti	GIM
2013	1	Cholera	Y	Low income	Haiti	PROMED
2014	5	Chikungunya	Y	Low income	Haiti	GIM
2014	8	Anthrax	Y	Low income	Haiti	GIM
2015	4	Cholera	Y	Low income	Haiti	PROMED
2015	10	Cholera	Y	Low income	Haiti	GIM
2016	7	Cholera	Y	Low income	Haiti	GIM
2016	9	Cholera	Y	Low income	Haiti	PROMED
2018	6	Cholera	Y	Low income	Haiti	GIM
2018	11	Diphtheria	Y	Low income	Haiti	PROMED
2019	9	Dengue	Y	Low income	Haiti	GIM
2015	9	Cholera	Y	Middle Income	Iraq	DONS
2018	6	Cholera	Y	Middle Income	Iraq	GIM
2015	10	Cholera	Y	Middle Income	Iraq	PROMED
2014	3	Polio	Y	Middle Income	Iraq	DONS
2015	3	Cholera	N	Low income	Liberia	GIM
2016	5	Cholera	N	Low income	Liberia	DONS
2017	5	Cholera	N	Low income	Liberia	DONS
2018	2	Cholera	N	Low income	Liberia	DONS
2019	1	Cholera	N	Low income	Liberia	GIM
2016	n.a	Cholera	N	Low income	Liberia	UNICEF cholera platform
2017	n.a	Cholera	N	Low income	Liberia	UNICEF cholera platform
2014	3	Ebola	N	Low income	Liberia	DONS
2013	9	Lassa Fever	N	Low income	Liberia	GIM
2017	2	Lassa Fever	N	Low income	Liberia	GIM
2019	9	Lassa Fever	N	Low income	Liberia	GIM
2019	3	Cholera	Y	Middle Income	Libya	GIM
2011	4	Chikungunya	Y	Low income	Madagascar	GIM
2015	2	Cholera	Y	Low income	Madagascar	GIM
2015	7	Cholera	Y	Low income	Madagascar	DONS
2017	9	Cholera	Y	Low income	Madagascar	DONS
2018	9	Cholera	Y	Low income	Madagascar	GIM
2019	3	Cholera	Y	Low income	Madagascar	GIM
2018	10	Measles	Y	Low income	Madagascar	DONS
2011	4	Plague	Y	Low income	Madagascar	GIM
2013	12	Plague	Y	Low income	Madagascar	GIM
2014	11	Plague	Y	Low income	Madagascar	GIM
2016	12	Plague	Y	Low income	Madagascar	GIM
2014	11	Plague	Y	Low income	Madagascar	PROMED
2017	9	Plague	Y	Low income	Madagascar	PROMED
2014	11	Polio	Y	Low income	Madagascar	DONS
2015	2	Cholera	N	Low income	Malawi	RW
2015	12	Cholera	N	Low income	Malawi	RW
2016	4	Cholera	N	Low income	Malawi	GIM
2017	3	Cholera	N	Low income	Malawi	GIM
2018	12	Cholera	N	Low income	Malawi	GIM
2012	5	Malaria	N	Low income	Malawi	GIM
2010	5	Measles	N	Low income	Malawi	PROMED
2011	7	Cholera	Y	Low income	Mali	PROMED
2012	7	Cholera	Y	Low income	Mali	PROMED
2017	7	Cholera	Y	Low income	Mali	GIM
2014	10	Ebola	Y	Low income	Mali	DONS
2010	1	Cholera	Y	Low income	Mozambique	PROMED
2011	1	Cholera	Y	Low income	Mozambique	PROMED
2012	3	Cholera	Y	Low income	Mozambique	GIM
2014	3	Cholera	Y	Low income	Mozambique	GIM
2014	4	Dengue	Y	Low income	Mozambique	GIM
2015	1	Cholera	Y	Low income	Mozambique	GIM
2015	10	Cholera	Y	Low income	Mozambique	PROMED
2017	2	Cholera	Y	Low income	Mozambique	PROMED
2017	10	Cholera	Y	Low income	Mozambique	DONS
2019	1	Cholera	Y	Low income	Mozambique	DONS
2019	6	Malaria	Y	Low income	Mozambique	GIM
2014	1	Cholera	Y	Middle Income	Myanmar	GIM
2015	6	Cholera	Y	Middle Income	Myanmar	GIM
2015	12	Cholera	Y	Middle Income	Myanmar	DONS
2016	7	Cholera	Y	Middle Income	Myanmar	GIM
2017	5	Cholera	Y	Middle Income	Myanmar	GIM
2018	5	Cholera	Y	Middle Income	Myanmar	GIM
2012	10	Dengue	Y	Middle Income	Myanmar	GIM
2014	8	Dengue	Y	Middle Income	Myanmar	GIM
2016	12	Dengue	Y	Middle Income	Myanmar	GIM
2019	6	Dengue	Y	Middle Income	Myanmar	GIM
2014	8	Ebola	Y	Middle Income	Myanmar	GIM
2019	6	Polio	Y	Middle Income	Myanmar	DONS
2014	5	Cholera	Y	Low income	Nepal	GIM
2015	7	Cholera	Y	Low income	Nepal	GIM
2016	7	Cholera	Y	Low income	Nepal	GIM
2017	5	Cholera	Y	Low income	Nepal	GIM
2018	6	Cholera	Y	Low income	Nepal	GIM
2019	5	Cholera	Y	Low income	Nepal	GIM
2017	n.a	Cholera	Y	Low income	Nepal	PubMed
2010	9	Dengue	Y	Low income	Nepal	GIM
2011	8	Dengue	Y	Low income	Nepal	GIM
2012	6	Dengue	Y	Low income	Nepal	GIM
2013	6	Dengue	Y	Low income	Nepal	GIM
2014	8	Dengue	Y	Low income	Nepal	GIM
2016	12	Dengue	Y	Low income	Nepal	GIM
2019	6	Dengue	Y	Low income	Nepal	GIM
2010	9	Japanese Encephalitis	Y	Low income	Nepal	GIM
2011	8	Japanese Encephalitis	Y	Low income	Nepal	GIM
2012	7	Japanese Encephalitis	Y	Low income	Nepal	GIM
2014	8	Japanese Encephalitis	Y	Low income	Nepal	GIM
2010	7	Cholera	Y	Low income	Niger	DONS
2011	6	Cholera	Y	Low income	Niger	PROMED
2012	5	Meningitis	Y	Low income	Niger	RW
2012	7	Cholera	Y	Low income	Niger	PROMED
2013	2	Polio	Y	Low income	Niger	DONS
2014	9	Cholera	Y	Low income	Niger	RW
2015	3	Cholera	Y	Low income	Niger	GIM
2015	4	Meningitis	Y	Low income	Niger	PROMED
2016	2	Cholera	Y	Low income	Niger	RW
2016	9	Cholera	Y	Low income	Niger	GIM
2016	9	Rift Valley Fever	Y	Low income	Niger	PROMED
2017	3	Cholera	Y	Low income	Niger	RW
2017	5	Hepatitis E	Y	Low income	Niger	PROMED
2018	7	Cholera	Y	Low income	Niger	GIM
2019	4	Cholera	Y	Low income	Niger	DONS
2015	n.a	Cholera	Y	Low income	Niger	UNICEF cholera platform
2016	n.a	Cholera	Y	Low income	Niger	UNICEF cholera platform
2019	n.a	Cholera	Y	Low income	Niger	UNICEF cholera platform
2010	1	Cholera	Y	Middle Income	Nigeria	DONS
2010	2	Cholera	Y	Middle Income	Nigeria	PROMED
2011	2	Lassa Fever	Y	Middle Income	Nigeria	PROMED
2011	7	Measles	Y	Middle Income	Nigeria	DONS
2012	1	Lassa Fever	Y	Middle Income	Nigeria	GIM
2012	5	Malaria	Y	Middle Income	Nigeria	GIM
2012	5	Polio	Y	Middle Income	Nigeria	GIM
2012	7	Measles	Y	Middle Income	Nigeria	PROMED
2013	1	Lassa Fever	Y	Middle Income	Nigeria	PROMED
2013	6	Meningococcal disease	Y	Middle Income	Nigeria	DONS
2013	9	Lassa Fever	Y	Middle Income	Nigeria	GIM
2013	10	Cholera	Y	Middle Income	Nigeria	GIM
2013	10	Polio	Y	Middle Income	Nigeria	GIM
2014	4	Dengue	Y	Middle Income	Nigeria	GIM
2014	6	Polio	Y	Middle Income	Nigeria	GIM
2014	7	Ebola	Y	Middle Income	Nigeria	GIM
2015	3	Cholera	Y	Middle Income	Nigeria	DONS
2016	1	Cholera	Y	Middle Income	Nigeria	DONS
2016	10	Cholera	Y	Middle Income	Nigeria	DONS
2016	12	Lassa Fever	Y	Middle Income	Nigeria	GIM
2016	12	Meningitis	Y	Middle Income	Nigeria	RW
2017	3	Cholera	Y	Middle Income	Nigeria	DONS
2017	6	Cholera	Y	Middle Income	Nigeria	DONS
2018	1	Lassa Fever	Y	Middle Income	Nigeria	PROMED
2018	1	Polio	Y	Middle Income	Nigeria	PROMED
2018	3	Cholera	Y	Middle Income	Nigeria	DONS
2018	9	Cholera	Y	Middle Income	Nigeria	DONS
2018	12	Lassa Fever	Y	Middle Income	Nigeria	PROMED
2019	6	Lassa Fever	Y	Middle Income	Nigeria	GIM
2019	6	Polio	Y	Middle Income	Nigeria	GIM
2019	7	Yellow fever	Y	Middle Income	Nigeria	DONS
2019	10	Dengue	Y	Middle Income	Nigeria	GIM
2015	n.a	Cholera	Y	Middle Income	Nigeria	UNICEF cholera platform
2016	n.a	Cholera	Y	Middle Income	Nigeria	UNICEF cholera platform
2019	n.a	Cholera	Y	Middle Income	Nigeria	UNICEF cholera platform
2016	10	Cholera	N	Low income	North Korea	GIM
2012	2	Anthrax	Y	Middle Income	Pakistan	GIM
2012	9	Anthrax	Y	Middle Income	Pakistan	GIM
2014	3	Anthrax	Y	Middle Income	Pakistan	GIM
2010	9	CCHF	Y	Middle Income	Pakistan	GIM
2011	9	CCHF	Y	Middle Income	Pakistan	GIM
2012	5	CCHF	Y	Middle Income	Pakistan	PROMED
2014	4	CCHF	Y	Middle Income	Pakistan	GIM
2019	7	CCHF	Y	Middle Income	Pakistan	GIM
2016	12	Chikungunya	Y	Middle Income	Pakistan	GIM
2010	10	Cholera	Y	Middle Income	Pakistan	DONS
2013	8	Cholera	Y	Middle Income	Pakistan	GIM
2014	7	Cholera	Y	Middle Income	Pakistan	GIM
2015	3	Cholera	Y	Middle Income	Pakistan	GIM
2016	11	Cholera	Y	Middle Income	Pakistan	DONS
2017	7	Cholera	Y	Middle Income	Pakistan	RW
2019	5	Cholera	Y	Middle Income	Pakistan	RW
2010	8	Dengue	Y	Middle Income	Pakistan	GIM
2016	12	Dengue	Y	Middle Income	Pakistan	GIM
2019	6	Dengue	Y	Middle Income	Pakistan	GIM
2011	8	Dengue	Y	Middle Income	Pakistan	PROMED
2012	10	Dengue	Y	Middle Income	Pakistan	PROMED
2014	11	Ebola	Y	Middle Income	Pakistan	GIM
2011	9	Japanese Encephalitis	Y	Middle Income	Pakistan	GIM
2019	7	Malaria	Y	Middle Income	Pakistan	GIM
2012	6	Measles	Y	Middle Income	Pakistan	PROMED
2012	11	Measles	Y	Middle Income	Pakistan	PROMED
2013	12	Meningitis	Y	Middle Income	Pakistan	GIM
2011	7	Polio	Y	Middle Income	Pakistan	DONS
2012	5	Polio	Y	Middle Income	Pakistan	GIM
2013	1	Polio	Y	Middle Income	Pakistan	RW
2013	10	Polio	Y	Middle Income	Pakistan	GIM
2016	12	Polio	Y	Middle Income	Pakistan	DONS
2019	6	Polio	Y	Middle Income	Pakistan	GIM
2015	3	Cholera	Y	Middle Income	Palestinian Territory	GIM
2018	6	Cholera	N	Low income	Rwanda	GIM
2014	8	Ebola	N	Low income	Rwanda	GIM
2012	2	Cholera	N	Low income	Sierra Leone	DONS
2015	2	Cholera	N	Low income	Sierra Leone	GIM
2016	7	Cholera	N	Low income	Sierra Leone	GIM
2018	6	Cholera	N	Low income	Sierra Leone	GIM
2019	n.a	Cholera	N	Low income	Sierra Leone	UNICEF cholera platform
2014	6	Ebola	N	Low income	Sierra Leone	PROMED
2010	9	Lassa Fever	N	Low income	Sierra Leone	GIM
2013	8	Lassa Fever	N	Low income	Sierra Leone	GIM
2019	11	Lassa Fever	N	Low income	Sierra Leone	GIM
2011	3	Yellow fever	N	Low income	Sierra Leone	DONS
2011	3	Cholera	Y	Low income	Somalia	PROMED
2011	4	Measles	Y	Low income	Somalia	PROMED
2011	9	Dengue	Y	Low income	Somalia	GIM
2012	5	Cholera	Y	Low income	Somalia	GIM
2013	5	Polio	Y	Low income	Somalia	DONS
2014	4	Cholera	Y	Low income	Somalia	GIM
2014	5	Measles	Y	Low income	Somalia	RW
2016	3	Cholera	Y	Low income	Somalia	UNICEF cholera platform
2016	12	Cholera	Y	Low income	Somalia	GIM
2017	12	Cholera	Y	Low income	Somalia	DONS
2018	9	Cholera	Y	Low income	Somalia	GIM
2019	5	Cholera	Y	Low income	Somalia	GIM
2018	n.a	Cholera	Y	Low income	Somalia	UNICEF cholera platform
2014	1	Cholera	Y	Low income	South Sudan	PubMed
2014	5	Cholera	Y	Low income	South Sudan	DONS
2015	3	Cholera	Y	Low income	South Sudan	RW
2016	5	Cholera	Y	Low income	South Sudan	DONS
2017	5	Cholera	Y	Low income	South Sudan	PubMed
2018	12	Cholera	Y	Low income	South Sudan	RW
2019	9	Cholera	Y	Low income	South Sudan	GIM
2014	5	Cholera	Y	Low income	South Sudan	PROMED
2012	11	Hepatitis E	Y	Low income	South Sudan	PROMED
2011	10	Leishmaniasis	Y	Low income	South Sudan	PROMED
2012	9	Leishmaniasis	Y	Low income	South Sudan	PROMED
2013	9	Measles	Y	Low income	South Sudan	RW
2013	6	Meningococcal disease	Y	Low income	South Sudan	DONS
2014	11	Polio	Y	Low income	South Sudan	DONS
2014	4	Leishmaniasis	Y	Low income	South Sudan	RW
2011	3	Anthrax	Y	Middle Income	Sudan	GIM
2019	7	Chikungunya	Y	Middle Income	Sudan	GIM
2015	3	Cholera	Y	Middle Income	Sudan	RW
2015	11	Cholera	Y	Middle Income	Sudan	GIM
2016	8	Cholera	Y	Middle Income	Sudan	RW
2018	1	Cholera	Y	Middle Income	Sudan	GIM
2018	5	Cholera	Y	Middle Income	Sudan	DONS
2014	6	Dengue	Y	Middle Income	Sudan	GIM
2019	11	Dengue	Y	Middle Income	Sudan	GIM
2019	9	Malaria	Y	Middle Income	Sudan	GIM
2012	4	Meningococcal disease	Y	Middle Income	Sudan	DONS
2013	9	Polio	Y	Middle Income	Sudan	GIM
2013	10	Rift Valley Fever	Y	Middle Income	Sudan	GIM
2019	10	Rift Valley Fever	Y	Middle Income	Sudan	GIM
2010	8	Typhoid	Y	Middle Income	Sudan	GIM
2012	10	Yellow Fever	Y	Middle Income	Sudan	PROMED
2013	10	Yellow fever	Y	Middle Income	Sudan	DONS
2015	8	Cholera	Y	Low income	Syrian Arab Republic	GIM
2016	8	Cholera	Y	Low income	Syrian Arab Republic	GIM
2017	6	Cholera	Y	Low income	Syrian Arab Republic	GIM
2013	10	Polio	Y	Low income	Syrian Arab Republic	RW
2012	7	Anthrax	N	Low income	Tajikistan	GIM
2013	7	Anthrax	N	Low income	Tajikistan	GIM
2011	6	CCHF	N	Low income	Tajikistan	GIM
2017	4	Cholera	N	Low income	Tajikistan	RW
2011	8	Dengue	N	Low income	Tajikistan	GIM
2010	1	Polio	N	Low income	Tajikistan	DONS
2013	7	Anthrax	N	Low income	Tanzania	GIM
2015	5	Cholera	N	Low income	Tanzania	DONS
2018	12	Cholera	N	Low income	Tanzania	GIM
2015	10	Cholera	N	Low income	Tanzania	PROMED
2018	n.a	Cholera	N	Low income	Tanzania	UNICEF cholera platform
2014	2	Dengue	N	Low income	Tanzania	GIM
2019	6	Dengue	N	Low income	Tanzania	GIM
2012	8	Ebola	N	Low income	Tanzania	GIM
2011	6	Measles	N	Low income	Tanzania	PROMED
2013	10	Meningitis	N	Low income	Tanzania	GIM
2012	2	Anthrax	N	Low income	Togo	GIM
2013	8	Cholera	N	Low income	Togo	RW
2014	2	Anthrax	N	Low income	Togo	GIM
2016	2	Cholera	N	Low income	Togo	RW
2017	1	Meningococcal disease	N	Low income	Togo	DONS
2017	3	Cholera	N	Low income	Togo	DONS
2019	1	Cholera	N	Low income	Togo	GIM
2015	n.a	Cholera	N	Low income	Togo	UNICEF cholera platform
2016	n.a	Cholera	N	Low income	Togo	UNICEF cholera platform
2010	2	Cholera	N	Low income	Uganda	PROMED
2010	10	Anthrax	N	Low income	Uganda	GIM
2010	12	Plague	N	Low income	Uganda	GIM
2010	12	Yellow Fever	N	Low income	Uganda	PROMED
2011	5	Ebola	N	Low income	Uganda	DONS
2011	11	Anthrax	N	Low income	Uganda	GIM
2011	11	Cholera	N	Low income	Uganda	PROMED
2012	3	Measles	N	Low income	Uganda	PROMED
2012	7	Ebola	N	Low income	Uganda	PROMED
2012	7	Ebola	N	Low income	Uganda	DONS
2013	1	Cholera	N	Low income	Uganda	RW
2013	8	CCHF	N	Low income	Uganda	GIM
2013	8	Measles	N	Low income	Uganda	RW
2014	1	Cholera	N	Low income	Uganda	PubMed
2014	2	Meningitis	N	Low income	Uganda	GIM
2014	10	Marburg	N	Low income	Uganda	DONS
2015	3	Cholera	N	Low income	Uganda	DONS
2016	3	Cholera	N	Low income	Uganda	GIM
2017	6	Cholera	N	Low income	Uganda	GIM
2019	6	Ebola	N	Low income	Uganda	DONS
2019	8	CCHF	N	Low income	Uganda	GIM
2019	12	Rift Valley Fever	N	Low income	Uganda	GIM
2015	9	Cholera	Y	Middle Income	Ukraine	DONS
2018	10	Cholera	Y	Middle Income	Ukraine	GIM
2015	9	Polio	Y	Middle Income	Ukraine	PROMED
2018	8	Cholera	Y	Middle Income	Venezuela	GIM
2019	6	Dengue	Y	Middle Income	Venezuela	GIM
2018	11	Diphtheria	Y	Middle Income	Venezuela	PROMED
2019	8	Malaria	Y	Middle Income	Venezuela	GIM
2018	4	Measles	Y	Middle Income	Venezuela	PROMED
2015	6	Cholera	Y	Low income	Yemen	GIM
2016	10	Cholera	Y	Low income	Yemen	RW
2017	8	Cholera	Y	Low income	Yemen	DONS
2019	3	Cholera	Y	Low income	Yemen	GIM
2012	4	Dengue	Y	Low income	Yemen	GIM
2019	11	Dengue	Y	Low income	Yemen	GIM
2017	12	Diphtheria	Y	Low income	Yemen	PROMED
2012	3	Measles	Y	Low income	Yemen	PROMED
